# Supplementary material
Source: Springer Nature journal article supplement (https://www.springermedizin.de/resource/supplementary/13048_2013_198_MOESM1_ESM.pdf/9665114)

Normal and high-responder patients undergoing their 1<sup>st</sup> IVF attempt

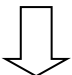

COH with a GnRH antagonist

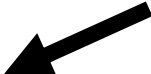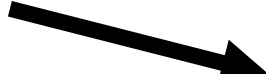

Patients at risk to develop severe OHSS

Patients not at risk to develop severe OHSS

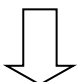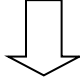

GnRHa- to trigger ovulation

HCG- to trigger ovulation

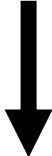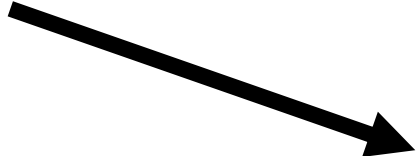

OPU > 20 oocytes

OPU < 20 oocytes

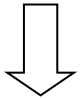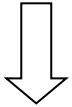

Freeze all policy

Intensive luteal support with E2 and progesterone. Follow 3 days post OPU

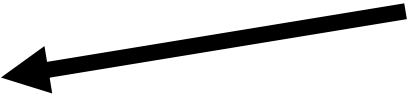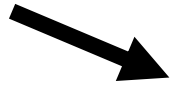

Signs of early OHSS

No signs of early OHSS

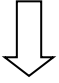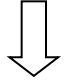

Transfer one embryo and the patient is instructed to continue intense luteal support

Transfer one embryo and the patient is instructed to inject 1500 IU of HCG and to continue intense luteal support

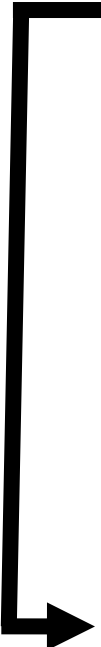

Supplement: MOESM1 [file 9665114]
